# Supplementary material for: Rapid spread of a SARS-CoV-2 Delta variant with a frameshift deletion in ORF7a
Source: bioRxiv or medRxiv preprint supplement (doi:10.1101/2021.08.18.21262089), 2021-08-21
Supplement: Supplementary file [file media-1.pdf]

## Supplementary Appendix

We gratefully acknowledge the following Authors from the Originating laboratories responsible for obtaining the specimens, as well as the Submitting laboratories where the genome data were generated and shared via GISAID, on which this research is based. For details of the Australian samples, see Supplementary Table S1. Due to limitations of the GISAID output of sample metadata, details for non-Australian samples are not included in Table S1 and areas follows:

| <b>Accession</b> | <b>Originating Lab</b>                                                       | <b>Submitting Lab</b>                                                      | <b>Authors</b>                                                                                                                                                                                                                                                                                                                                   |
|------------------|------------------------------------------------------------------------------|----------------------------------------------------------------------------|--------------------------------------------------------------------------------------------------------------------------------------------------------------------------------------------------------------------------------------------------------------------------------------------------------------------------------------------------|
| EPI_ISL_3122970  | Chelyabinsk Regional Dermatovenerologic Dispensary                           | WHO National Influenza Centre Russian Federation                           | Andrey Komissarov, Artem Fadeev, Kseniya Komissarova, Oula Mansour, Kirill Varchenko, Mikhail Bakaev, Tamila Musaeva, Veronika Eder, Maria Pisareva, Nikita Yolshin, Daria Danilenko, Maria Baturova, Alexey Masharsky, Ksenia Safina, Elena Nabieva, Georgii Bazykin, Dmitry Lioznov                                                            |
| EPI_ISL_2520482  | Queens Medical Centre, Clinical Microbiology Department / DeepSeq Nottingham | COVID-19 Genomics UK (COG-UK) Consortium                                   | Gemma Clark, Wendy Smith, Manjinder Khakh, Vicki M Fleming, Michelle M Lister, Hannah Howson-Wells, Jonathan Ball, Timothy Byaruhanga, Jayasree Dey, Emily Park, Jack Hill, Patrick McClure, Joseph Chappell, Theocharis Tsoleridis, Nadine Holmes, Matthew Carlisle, Christopher Moore, Fei Sang, Johnny Debebe, Victoria Wright, Matthew Loose |
| EPI_ISL_2551963  | Lighthouse Lab in Glasgow                                                    | Wellcome Sanger Institute for the COVID-19 Genomics UK (COG-UK) Consortium | Harper VanSteenhouse, Yumi Kasai, David Gray, Carol Clugston, Anna Dominiczak and Alex Alderton, Roberto Amato, Jeffrey Barrett, Sonia Goncalves, Ewan Harrison, David K. Jackson, Ian Johnston, Dominic Kwiatkowski, Cordelia Langford, John Sillitoe on behalf of the Wellcome Sanger Institute COVID-19 Surveillance Team                     |
| EPI_ISL_2717209  | Lighthouse Lab in Alderley Park                                              | Wellcome Sanger Institute for the COVID-19 Genomics UK (COG-UK) Consortium | Jacquelyn Wynn, Mairead Hyland, The Lighthouse Lab in Alderley Park and Alex Alderton, Roberto Amato, Jeffrey Barrett, Sonia Goncalves, Ewan Harrison, David K. Jackson, Ian Johnston, Dominic Kwiatkowski,                                                                                                                                      |

|                 |                                   |                                                                                            |                                                                                                                                                                                                                                                                                                                                                                                                                                                                                                                                                                                                                                                                                                                                                                                                                                                                                                                                                                                                                                                                                                                                                                       |
|-----------------|-----------------------------------|--------------------------------------------------------------------------------------------|-----------------------------------------------------------------------------------------------------------------------------------------------------------------------------------------------------------------------------------------------------------------------------------------------------------------------------------------------------------------------------------------------------------------------------------------------------------------------------------------------------------------------------------------------------------------------------------------------------------------------------------------------------------------------------------------------------------------------------------------------------------------------------------------------------------------------------------------------------------------------------------------------------------------------------------------------------------------------------------------------------------------------------------------------------------------------------------------------------------------------------------------------------------------------|
| EPI_ISL_2306457 | Laboratory Corporation of America | Centers for Disease Control and Prevention, Division of Viral Diseases, Pathogen Discovery | <p>Cordelia Langford, John Sillitoe on behalf of the Wellcome Sanger Institute COVID-19 Surveillance Team</p> <p>Dakota Howard, Dhvani Batra, Peter W. Cook, Kara Moser, Adrian Paskey, Jason Caravas, Benjamin Rambo-Martin, Shatavia Morrison, Christopher Gulvick, Scott Sammons, Yvette Unoarumhi, Darlene Wagner, Matthew Schmerer, Minoo Agarwal, Eyad Almasri, Debbie Boles, Ayla Burns, Nuthawin Charoensri, Oren Cohen, Susan Countryman, Mary Ann Cristobal, Bobbi Croy, Suzanne Dale, Hrushikesh Deshmukh, Amanda Douglas, Vincent Drouillon, Marcia Eisenberg, Howard Engler, Rama Ghatti, Prashant Gupta, Susan Hicks, Jake Humphrey, Lax Iyer, Manoj Jain, Mohan Kolli, Brian Krueger, Tim Kuphal, Stanley Letovsky, Michael Levandoski, Craig Lukasik, Jonathan Meltzer, Brian Norvell, Mindy Nye, Scott Parker, Christos Petropoulos, John Pruitt, Steven Ragan, Scott Ryan, Mike Sapeta, Jana Schroth, Suresh Babu Selvaraju, Goran Stevovic, Amanda Suchanek, Andrea Throop, Lyndon Tilson, Thomas Urban, Joe Voshell, Kimberly Wagner, Jonathan Williams, Mary Williamson, Qian Zeng, Tricia Zwiefelhofer, Clinton R. Paden, Duncan MacCannell</p> |
| EPI_ISL_2398087 | Laboratory Corporation of America | Centers for Disease Control and Prevention, Division of Viral Diseases, Pathogen Discovery | <p>Dakota Howard, Dhvani Batra, Peter W. Cook, Kara Moser, Adrian Paskey, Jason Caravas, Benjamin Rambo-Martin, Shatavia Morrison, Christopher Gulvick, Scott Sammons, Yvette Unoarumhi, Darlene Wagner, Matthew Schmerer, Minoo Agarwal, Eyad Almasri, Debbie</p>                                                                                                                                                                                                                                                                                                                                                                                                                                                                                                                                                                                                                                                                                                                                                                                                                                                                                                    |

EPI\_ISL\_2398923

Laboratory Corporation of  
America  
Centers for Disease  
Control and Prevention  
Division of Viral Diseases,  
Pathogen Discovery

Boles, Ayla Burns,  
Nuthawin Charoensri,  
Oren Cohen, Susan  
Countryman, Mary Ann  
Cristobal, Bobbi Croy,  
Suzanne Dale, Hrushikesh  
Deshmukh, Amanda  
Douglas, Vincent Drouillon,  
Marcia Eisenberg, Howard  
Engler, Rama Ghatti,  
Prashant Gupta, Susan  
Hicks, Jake Humphrey,  
Lax Iyer, Lisa Pfefferle,  
Manoj Jain, Matthew  
Robinson, Mohan Kolli,  
Brian Krueger, Tim Kuphal,  
Stanley Letovsky, Michael  
Levandoski, Craig Lukasik,  
Jonathan Meltzer, Brian  
Norvell, Mindy Nye, Scott  
Parker, Christos  
Petropoulos, John Pruitt,  
Steven Ragan, Scott  
Ryan, Mike Sapeta, Jana  
Schroth, Suresh Babu  
Selvaraju, Goran Stevovic,  
Amanda Suchanek,  
Andrea Throop, Lyndon  
Tilson, Thomas Urban, Joe  
Voshell, Kimberly Wagner,  
Jonathan Williams, Mary  
Williamson, Qian Zeng,  
Tricia Zwiefelhofer, Clinton  
R. Paden, Duncan  
MacCannell  
Dakota Howard, Dhvani  
Batra, Peter W. Cook,  
Kara Moser, Adrian  
Paskey, Jason Caravas,  
Benjamin Rambo-Martin,  
Shatavia Morrison,  
Christopher Gulvick, Scott  
Sammons, Yvette  
Unoarumhi, Darlene  
Wagner, Matthew  
Schmerer, Minoo Agarwal,  
Eyad Almasri, Debbie  
Boles, Ayla Burns,  
Nuthawin Charoensri,  
Oren Cohen, Susan  
Countryman, Mary Ann  
Cristobal, Bobbi Croy,  
Suzanne Dale, Hrushikesh  
Deshmukh, Amanda  
Douglas, Vincent Drouillon,  
Marcia Eisenberg, Howard  
Engler, Rama Ghatti,  
Prashant Gupta, Susan  
Hicks, Jake Humphrey,  
Lax Iyer, Lisa Pfefferle,  
Manoj Jain, Matthew  
Robinson, Mohan Kolli,  
Brian Krueger, Tim Kuphal,

---

---

Stanley Letovsky, Michael Levandoski, Craig Lukasik, Jonathan Meltzer, Brian Norvell, Mindy Nye, Scott Parker, Christos Petropoulos, John Pruitt, Steven Ragan, Scott Ryan, Mike Sapeta, Jana Schroth, Suresh Babu Selvaraju, Goran Stevovic, Amanda Suchanek, Andrea Throop, Lyndon Tilson, Thomas Urban, Joe Voshell, Kimberly Wagner, Jonathan Williams, Mary Williamson, Qian Zeng, Tricia Zwiefelhofer, Clinton R. Paden, Duncan MacCannell

---

### **Supplementary Table Caption**

**Table S1:** GISAID accessions for all samples used in this research, acknowledgements for the originating and submitting laboratories, and associated authors. Note: Authors are sorted alphabetically, as per GISAID output.
