# Supplementary material for: Rapid spread of a SARS-CoV-2 Delta variant with a frameshift deletion in ORF7a
Source: bioRxiv or medRxiv preprint supplement (doi:10.1101/2021.08.18.21262089), 2021-08-21
Supplement: Supplementary file [file media-2.pdf]

EPI\_ISL\_3401719, EPI\_ISL\_3401720, EPI\_ISL\_3401721, EPI\_ISL\_3401722, EPI\_ISL\_3401723, EPI\_ISL\_3401724, EPI\_ISL\_3401725, EPI\_ISL\_3401726, EPI\_ISL\_3401727, EPI\_ISL\_3401728, EPI\_ISL\_3401729, EPI\_ISL\_3401730, EPI\_ISL\_3401731, EPI\_ISL\_3401732, EPI\_ISL\_3401733, EPI\_ISL\_3401734, EPI\_ISL\_3401735, EPI\_ISL\_3401736, EPI\_ISL\_3401737, EPI\_ISL\_3401738, EPI\_ISL\_3401739, EPI\_ISL\_3401751, EPI\_ISL\_3401752, EPI\_ISL\_3401783, EPI\_ISL\_3401786, EPI\_ISL\_3401790, EPI\_ISL\_3401791, EPI\_ISL\_3401792

see above

Sydney South West Pathology Service (SSWPS) - Liverpool Hospital - NSW Health Pathology

NSW Health Pathology - Institute of Clinical Pathology and Medical Research; Westmead Hospital; University of Sydney

Arnott A.; CIDM-PH et al.; Draper J.; Gall M.; Martinez E.; Rockett R.; Sintchenko V.; on behalf of ICPMR

EPI\_ISL\_803110, EPI\_ISL\_803111, EPI\_ISL\_803112, EPI\_ISL\_803113, EPI\_ISL\_803114, EPI\_ISL\_806729, EPI\_ISL\_825016, EPI\_ISL\_845798, EPI\_ISL\_845799, EPI\_ISL\_845805, EPI\_ISL\_845806, EPI\_ISL\_872579, EPI\_ISL\_872586, EPI\_ISL\_872587, EPI\_ISL\_872588, EPI\_ISL\_914875, EPI\_ISL\_914876, EPI\_ISL\_914877, EPI\_ISL\_1383246, EPI\_ISL\_1904446, EPI\_ISL\_1904447, EPI\_ISL\_1904448, EPI\_ISL\_1904467, EPI\_ISL\_2405111, EPI\_ISL\_2405112, EPI\_ISL\_2462409, EPI\_ISL\_2462411, EPI\_ISL\_2462415, EPI\_ISL\_2462417, EPI\_ISL\_2462421, EPI\_ISL\_2462426, EPI\_ISL\_2462427, EPI\_ISL\_2462428, EPI\_ISL\_2462429, EPI\_ISL\_2650468, EPI\_ISL\_2650469, EPI\_ISL\_2650470, EPI\_ISL\_2828059, EPI\_ISL\_2828060, EPI\_ISL\_2828061, EPI\_ISL\_2828062, EPI\_ISL\_2828063, EPI\_ISL\_2828064, EPI\_ISL\_2828065, EPI\_ISL\_2828066, EPI\_ISL\_2828067, EPI\_ISL\_2828068, EPI\_ISL\_3184935, EPI\_ISL\_3184973, EPI\_ISL\_3184974, EPI\_ISL\_3184975, EPI\_ISL\_3184976, EPI\_ISL\_3184977, EPI\_ISL\_3184978, EPI\_ISL\_3184979, EPI\_ISL\_3184980, EPI\_ISL\_3184981, EPI\_ISL\_3184982, EPI\_ISL\_3184983, EPI\_ISL\_3184984, EPI\_ISL\_3185003, EPI\_ISL\_3185004, EPI\_ISL\_3185005, EPI\_ISL\_3185006, EPI\_ISL\_3185007, EPI\_ISL\_3185040, EPI\_ISL\_3185041, EPI\_ISL\_3185042, EPI\_ISL\_3185043, EPI\_ISL\_3185213, EPI\_ISL\_3185214, EPI\_ISL\_3185215, EPI\_ISL\_3185216, EPI\_ISL\_3185217, EPI\_ISL\_3185218, EPI\_ISL\_3185219, EPI\_ISL\_3185220, EPI\_ISL\_3185221, EPI\_ISL\_3185222, EPI\_ISL\_3185224, EPI\_ISL\_3185225, EPI\_ISL\_3185226, EPI\_ISL\_3185233, EPI\_ISL\_3185258, EPI\_ISL\_3305411, EPI\_ISL\_3398381, EPI\_ISL\_3398382, EPI\_ISL\_3398383

see above

Sydney South West Pathology Service (SSWPS) - Royal Prince Alfred Hospital - NSW Health Pathology

NSW Health Pathology - Institute of Clinical Pathology and Medical Research; Westmead Hospital; University of Sydney

Arnott A.; CIDM-PH et al.; Draper J.; Gall M.; Martinez E.; Rockett R.; Sintchenko V.; on behalf of ICPMR

EPI\_ISL\_3185198, EPI\_ISL\_3185252, EPI\_ISL\_3186466, EPI\_ISL\_3186467, EPI\_ISL\_3186591, EPI\_ISL\_3186678, EPI\_ISL\_3186679, EPI\_ISL\_3186679, EPI\_ISL\_3186748, EPI\_ISL\_3186752, EPI\_ISL\_3186756, EPI\_ISL\_3186904, EPI\_ISL\_3186905, EPI\_ISL\_3186906, EPI\_ISL\_3186907, EPI\_ISL\_3186908, EPI\_ISL\_3186909, EPI\_ISL\_3187175, EPI\_ISL\_3187211, EPI\_ISL\_3187212, EPI\_ISL\_3187225, EPI\_ISL\_3281306, EPI\_ISL\_3281307, EPI\_ISL\_3281308, EPI\_ISL\_3281309, EPI\_ISL\_3281310, EPI\_ISL\_3281310, EPI\_ISL\_3281311, EPI\_ISL\_3281312, EPI\_ISL\_3281314, EPI\_ISL\_3281315, EPI\_ISL\_3281316, EPI\_ISL\_3281317, EPI\_ISL\_3281318, EPI\_ISL\_3281319, EPI\_ISL\_3281320, EPI\_ISL\_3281321, EPI\_ISL\_3281322, EPI\_ISL\_3398534, EPI\_ISL\_3398535, EPI\_ISL\_3398557, EPI\_ISL\_3398659

see above

The Children's Hospital at Westmead

NSW Health Pathology - Institute of Clinical Pathology and Medical Research; Westmead Hospital; University of Sydney

Arnott A.; CIDM-PH et al.; Draper J.; Gall M.; Martinez E.; Rockett R.; Sintchenko V.; on behalf of ICPMR

EPI\_ISL\_779648, EPI\_ISL\_779649, EPI\_ISL\_812435, EPI\_ISL\_812436, EPI\_ISL\_812438, EPI\_ISL\_812439, EPI\_ISL\_812440, EPI\_ISL\_812441, EPI\_ISL\_812442, EPI\_ISL\_854751, EPI\_ISL\_854752, EPI\_ISL\_854753, EPI\_ISL\_854757, EPI\_ISL\_854759, EPI\_ISL\_854762, EPI\_ISL\_877564, EPI\_ISL\_877565, EPI\_ISL\_877566, EPI\_ISL\_877567, EPI\_ISL\_877568, EPI\_ISL\_877569, EPI\_ISL\_877576, EPI\_ISL\_877577, EPI\_ISL\_877578, EPI\_ISL\_877582, EPI\_ISL\_877583, EPI\_ISL\_877584, EPI\_ISL\_933777, EPI\_ISL\_933779, EPI\_ISL\_962823, EPI\_ISL\_962824, EPI\_ISL\_962825, EPI\_ISL\_962828, EPI\_ISL\_962829, EPI\_ISL\_962830, EPI\_ISL\_962831, EPI\_ISL\_962832, EPI\_ISL\_979356, EPI\_ISL\_979362, EPI\_ISL\_979363, EPI\_ISL\_979364, EPI\_ISL\_1033154, EPI\_ISL\_1033155, EPI\_ISL\_1249993, EPI\_ISL\_1249996, EPI\_ISL\_1913198, EPI\_ISL\_1913199, EPI\_ISL\_1913200, EPI\_ISL\_1913201, EPI\_ISL\_1913202, EPI\_ISL\_1913203, EPI\_ISL\_1913204, EPI\_ISL\_1913205, EPI\_ISL\_1913206, EPI\_ISL\_1913207, EPI\_ISL\_1913208, EPI\_ISL\_1913209, EPI\_ISL\_1913211, EPI\_ISL\_1913212, EPI\_ISL\_2920925, EPI\_ISL\_2920927, EPI\_ISL\_2920928, EPI\_ISL\_2920929, EPI\_ISL\_2920930, EPI\_ISL\_2920931, EPI\_ISL\_2920932, EPI\_ISL\_2920933, EPI\_ISL\_2920934, EPI\_ISL\_2920935, EPI\_ISL\_2920936, EPI\_ISL\_2920937, EPI\_ISL\_2920938, EPI\_ISL\_2920939, EPI\_ISL\_2920940, EPI\_ISL\_2920941, EPI\_ISL\_2920942, EPI\_ISL\_2920943, EPI\_ISL\_2920944, EPI\_ISL\_2920945, EPI\_ISL\_2920946, EPI\_ISL\_2920947, EPI\_ISL\_2920948, EPI\_ISL\_2920949, EPI\_ISL\_2920950, EPI\_ISL\_2920951, EPI\_ISL\_2920952, EPI\_ISL\_2920953, EPI\_ISL\_2920954, EPI\_ISL\_2920955, EPI\_ISL\_2920956, EPI\_ISL\_2920957, EPI\_ISL\_2920958, EPI\_ISL\_2920959, EPI\_ISL\_2920960, EPI\_ISL\_2920961, EPI\_ISL\_2920962, EPI\_ISL\_2920963, EPI\_ISL\_2920964, EPI\_ISL\_2920965, EPI\_ISL\_2920966, EPI\_ISL\_2920968, EPI\_ISL\_2920969, EPI\_ISL\_2920971, EPI\_ISL\_2920970, EPI\_ISL\_2920971, EPI\_ISL\_2920972, EPI\_ISL\_2920973, EPI\_ISL\_2920974, EPI\_ISL\_2920975, EPI\_ISL\_2920976, EPI\_ISL\_2920977, EPI\_ISL\_2920978, EPI\_ISL\_2920979, EPI\_ISL\_2920980, EPI\_ISL\_2920981, EPI\_ISL\_2920982, EPI\_ISL\_2920983, EPI\_ISL\_2920984, EPI\_ISL\_2920985, EPI\_ISL\_2920986, EPI\_ISL\_2920987, EPI\_ISL\_2920988, EPI\_ISL\_2920989, EPI\_ISL\_2920990, EPI\_ISL\_2920991, EPI\_ISL\_2920992, EPI\_ISL\_2920993, EPI\_ISL\_2920994, EPI\_ISL\_2920995, EPI\_ISL\_2920996, EPI\_ISL\_2920997, EPI\_ISL\_2920998, EPI\_ISL\_2920999, EPI\_ISL\_2921000, EPI\_ISL\_2978348, EPI\_ISL\_2978349, EPI\_ISL\_2978350, EPI\_ISL\_2978351, EPI\_ISL\_3030411, EPI\_ISL\_3030414, EPI\_ISL\_3030415, EPI\_ISL\_3030416, EPI\_ISL\_3050801, EPI\_ISL\_3134919, EPI\_ISL\_3134920

see above

Victorian Infectious Diseases Reference Laboratory (VIDRL)

VIDRL and MDU-PHL

Caly L.; Druce J.; M.L.; N.L.; Sait; Seemann T.; Sherry

EPI\_ISL\_1938308, EPI\_ISL\_2675251

unknown

PHV-FSS

Son Nguyen
